# Supplementary material
Source: HighWire-hosted journal article supplement (https://cmaj.ca/highwire/filestream/75587/field_highwire_adjunct_files/0/200648-guide-1-at.pdf)
Supplement: 200648-guide-1-at.pdf [file 200648-guide-1-at.pdf]

## Appendix 1 (as supplied by the authors): Summary of findings for corticosteroids

**Table 1: GRADE summary of findings: Corticosteroids in COVID-19 with ARDS, direct evidence from observational studies of COVID-19 with ARDS patients**

| Outcomes  | Relative effects                                                                                            | Absolute effect estimates                    |                          | Quality of evidence                             | Plain language summary                                              |
|-----------|-------------------------------------------------------------------------------------------------------------|----------------------------------------------|--------------------------|-------------------------------------------------|---------------------------------------------------------------------|
|           |                                                                                                             | Baseline risk for control group <sup>1</sup> | Difference (95% CI)      |                                                 |                                                                     |
| Mortality | HR 0.41 (95% CI 0.20 to 0.83)<br>Based on data from 84 COVID-19 patients with ARDS in 1 observational study | 61.8%                                        | -29.2% (-44.3% to -6.8%) | Very low<br>(Serious imprecision <sup>2</sup> ) | We are very uncertain of the effect of corticosteroids on mortality |

Note: ARDS = acute respiratory distress syndrome, HR = hazard ratio, CI = confidence interval.

<sup>1</sup>Mortality baseline risk from COVID-19 ARDS patients without corticosteroid treatment – Wu C, et al. doi:10.1001/jamainternmed.2020.0994.

<sup>2</sup>Observational study started at low quality of evidence. Although confidence interval appears narrow the small sample size and implausibly large effect led to rating down for imprecision.

**Table 2: GRADE summary of findings: Corticosteroids in COVID-19 with ARDS, indirect evidence from randomized controlled trials of patients with ARDS**

| Outcomes                           | Relative effects                                                                | Absolute effect estimates                                   |                             | Quality of evidence                                                                                  | Plain language summary                                                            |
|------------------------------------|---------------------------------------------------------------------------------|-------------------------------------------------------------|-----------------------------|------------------------------------------------------------------------------------------------------|-----------------------------------------------------------------------------------|
|                                    |                                                                                 | Baseline risk for control group <sup>1</sup>                | Difference (95% CI)         |                                                                                                      |                                                                                   |
| Mortality                          | RR 0.72 (95% CI 0.55 to 0.93)<br>Based on data from 851 ARDS patients in 7 RCTs | 61.8%                                                       | - 17.3% (-27.8% to -4.3%)   | Low<br>(Very serious indirectness <sup>2</sup> )                                                     | Corticosteroids may result in a large reduction in mortality                      |
| Length of ICU stay                 | Based on data from 297 patients in 3 RCTs                                       | The median duration of length of ICU was 8.0 days           | MD 0.1 days (-3.0 to 3.2)   | Very Low<br>(Serious inconsistency, very serious indirectness and serious imprecision <sup>3</sup> ) | We are very uncertain of the effect of corticosteroids on length of ICU stay      |
| Length of hospital stay            | Based on data from 324 patients in 3 RCTs                                       | The median duration of length of stay was 18.0 days         | MD -3.6 days (-7.2 to 0.02) | Very Low<br>(Very serious indirectness and serious imprecision <sup>4</sup> )                        | We are very uncertain of the effect of corticosteroids on length of hospital stay |
| Duration of mechanical ventilation | Based on data from 888 patients in 6 RCTs                                       | The median duration of mechanical ventilation was 14.5 days | MD -4.8 days (-7.0 to -2.6) | Low<br>(Very serious indirectness <sup>2</sup> )                                                     | Corticosteroids may reduce duration of mechanical ventilation                     |
| Serious hyperglycemia              | RR 1.12 (95% CI 1.01 to 1.24)<br>Based on data from 565 patients in 3 RCTs      | 67.6%                                                       | 8.1% (0.7% to 16.2%)        | Low<br>(Serious indirectness and serious imprecision <sup>5</sup> )                                  | Corticosteroids may increase serious hyperglycemia events                         |
| Neuromuscular weakness             | RR 0.85 (95% CI 0.62 to 1.18)<br>Based on data from 271 patients in 2 RCTs      | 26.4%                                                       | -3.9% (-10% to 4.7%)        | Low<br>(Serious indirectness, serious imprecision <sup>6</sup> )                                     | Corticosteroids may not increase neuromuscular weakness                           |

|                           |                                                                            |       |                        |                                                                  |                                                                |
|---------------------------|----------------------------------------------------------------------------|-------|------------------------|------------------------------------------------------------------|----------------------------------------------------------------|
| Gastrointestinal bleeding | RR 0.71 (95% CI 0.30 to 1.73)<br>Based on data from 250 patients in 2 RCTs | 14.0% | -4.0% (-9.8% to 10.2%) | Low<br>(Serious indirectness, serious imprecision <sup>6</sup> ) | Corticosteroids may not increase gastrointestinal bleeding     |
| Superinfection            | RR 0.82 (95% CI 0.67 to 1.02)<br>Based on data from 798 patients in 5 RCTs | 33.0% | -5.9% (-10.8% to 0.6%) | Moderate<br>(Serious indirectness <sup>7</sup> )                 | Corticosteroids probably do not increase superinfection events |

Note: RR = risk ratio, CI = confidence interval, RCTs = randomized controlled trials, MD = mean difference, ICU = intensive care unit.

1Mortality baseline risk from COVID-19 ARDS patients without corticosteroid treatment – Wu C, et al. doi:10.1001/jamainternmed.2020.0994. The baseline risk for the length of ICU stay, hospital stay, duration of mechanical ventilation and adverse events obtained from the median estimate from the control group in the included RCTs.

2We rated down two levels due to indirectness; the ARDS etiology across the studies is inconsistent and might not represent the COVID-19 population.

3We rated down two levels due to indirectness; one for inconsistency ( $I^2=73%$ , heterogeneity p-value 0.03) and one for imprecision because effect estimate consistent with benefit or harm.

4We rated down two levels due to indirectness and one for of imprecision due to the confidence interval including a trivial reduction in hospital stay.

5We rated down by one level due to indirectness, as we do not expect the COVID-19 population differs as much from other populations in adverse effects as in benefits; and we rated down by one level for imprecision due to the lower confidence interval, 0.7% representing an unimportant increase in hyperglycemia.

6We rated down by one level due to indirectness as in 4; we rated down by one level for imprecision, effect estimate consistent with benefit or harm.

7We rated down by one level due to indirectness as in 4; we did not rate down due to imprecision because the largest degree of harm consistent with the evidence is 7 in 1,000, which we judge unimportant.

**Table 3: GRADE summary of findings: Corticosteroids in severe COVID-19, direct evidence from observational studies of severe COVID-19 patients**

| Outcomes  | Relative effects                                                                                            | Absolute effect estimates                    |                     | Quality of evidence                             | Plain language summary                                              |
|-----------|-------------------------------------------------------------------------------------------------------------|----------------------------------------------|---------------------|-------------------------------------------------|---------------------------------------------------------------------|
|           |                                                                                                             | Baseline risk for control group <sup>1</sup> | Difference (95% CI) |                                                 |                                                                     |
| Mortality | HR 2.30 (95% CI 1.00 to 5.29)<br>Based on data from 331 severe COVID-19 patients in 2 observational studies | 10.4%                                        | 11.9% (0 to 33.7%)  | Very low<br>(Serious imprecision <sup>2</sup> ) | We are very uncertain of the effect of corticosteroids on mortality |

Note: HR = hazard ratio, CI = confidence interval.

<sup>1</sup>Baseline risk from a study of the severe COVID-19 patients without corticosteroids use - Guan W et al. doi: 10.1056/NEJMoa2002032.

<sup>2</sup>Observational study started at low quality of evidence. We rated down one level due to serious imprecision (wide confidence interval).

**Table 4: GRADE summary of findings: Corticosteroids in severe COVID-19, indirect evidence from randomized controlled trials and observational studies of patients hospitalized with SARS**

| Outcomes                                                 | Relative effects                                                                                  | Absolute effect estimates       |                          | Quality of evidence                                                                            | Plain language summary                                                                                      |
|----------------------------------------------------------|---------------------------------------------------------------------------------------------------|---------------------------------|--------------------------|------------------------------------------------------------------------------------------------|-------------------------------------------------------------------------------------------------------------|
|                                                          |                                                                                                   | Baseline risk for control group | Difference (95% CI)      |                                                                                                |                                                                                                             |
| Mortality                                                | HR 0.83 (95% CI 0.41 to 1.66)<br>Based on data from 6129 SARS patients in 2 observational studies | 10.4% <sup>1</sup>              | -1.7% (-6.0% to 6.3%)    | Very low<br>(Serious indirectness and serious imprecision <sup>2</sup> )                       | We are very uncertain of the effect of corticosteroids on mortality                                         |
| Median time for CoV RNA to become undetectable in plasma | Based on data from 16 SARS patients in 1 RCT                                                      | 8.0 days <sup>3</sup>           | MD 4.0 days (2.0 to 6.0) | Very low<br>(Serious risk of bias, serious indirectness and serious imprecision <sup>4</sup> ) | We are very uncertain of the effect of corticosteroids on time for CoV RNA to become undetectable in plasma |

Note: SARS = severe acute respiratory syndrome, HR = hazard ratio, CI = confidence interval, RNA = ribonucleic acid, RCT = randomized controlled trial, MD = mean difference.

<sup>1</sup>Baseline risk from a study of the severe COVID-19 patients without corticosteroids use - Guan W et al. doi: 10.1056/NEJMoa2002032.

<sup>2</sup>Observational studies start as low quality of evidence. We rated down one level due to serious indirectness (we applied the results to severe COVID-19 patients, but the relative effect was derived from SARS patients) and one level due to serious imprecision (the confidence interval includes both an important benefit and an important harm).

<sup>3</sup>Baseline risk from the randomized trial which reported median time for SAR-CoV RNA to become undetectable in plasma for no corticosteroids group - Lee N, et al. doi:10.1016/j.jcv.2004.07.006.

<sup>4</sup>Randomized trial started at high quality of evidence. We rated down due to serious risk of bias, serious indirectness (we applied the results to severe COVID-19 patients, but the relative effect was derived from SARS patients) and serious imprecision (because of small sample size).

**Table 5: GRADE summary of findings: Corticosteroids in severe COVID-19, indirect evidence from observational studies of patients hospitalized with MERS**

| Outcomes             | Relative effects                                                                                  | Absolute effect estimates       |                              | Quality of evidence                                                         | Plain language summary                                                            |
|----------------------|---------------------------------------------------------------------------------------------------|---------------------------------|------------------------------|-----------------------------------------------------------------------------|-----------------------------------------------------------------------------------|
|                      |                                                                                                   | Baseline risk for control group | Difference (95% CI)          |                                                                             |                                                                                   |
| Mortality            | OR 0.75 (95% CI 0.52 to 1.07)<br>Based on data from 290 MERS patients<br>in 1 observational study | 10.4% <sup>1</sup>              | -2.4% (-4.7% to 0.6%)        | Very low<br>(Serious indirectness and<br>serious imprecision <sup>2</sup> ) | We are very uncertain of the effect<br>of corticosteroids on mortality            |
| CoV RNA<br>clearance | HR 0.35 (95% CI 0.17 to 0.72)<br>Based on data from 189 MERS patients<br>in 1 observational study | 29.8% <sup>3</sup>              | -18.2% (-24.0% to -<br>7.3%) | Very low<br>(Serious imprecision <sup>4</sup> )                             | We are very uncertain of the effect<br>of corticosteroids on CoV RNA<br>clearance |

Note: MERS = middle east respiratory syndrome, OR = odds ratio, RNA = ribonucleic acid, HR = hazard ratio.

<sup>1</sup>Baseline risk from a study of the severe COVID-19 patients without corticosteroids use: Guan W et al. doi: 10.1056/NEJMoa2002032.

<sup>2</sup>Observational studies started at low quality of evidence. We rated down one level due to serious indirectness (we applied the results to severe COVID-19 patients, but the relative effect was derived from MERS patients), and one level due to serious imprecision (the confidence interval includes both a trivial and an important effect).

<sup>3</sup>Baseline risk from the observational study which reported MERS-CoV RNA clearance for no corticosteroids group: Arabi YM et al. doi: 10.1164/rccm.201706-1172OC.

<sup>4</sup>Observational studies started at low quality of evidence. We rated down one level due to serious imprecision because of the small sample size.

**Table 6: GRADE summary of findings: Corticosteroids in severe COVID-19, indirect evidence from observational studies of patients hospitalized with influenza**

| Outcomes               | Relative effects                                                                                    | Absolute effect estimates       |                        | Quality of evidence                                               | Plain language summary                                                                    |
|------------------------|-----------------------------------------------------------------------------------------------------|---------------------------------|------------------------|-------------------------------------------------------------------|-------------------------------------------------------------------------------------------|
|                        |                                                                                                     | Baseline risk for control group | Difference (95% CI)    |                                                                   |                                                                                           |
| Mortality              | OR 1.70 (95% CI 1.31 to 2.21)<br>Based on data from 8530 participants in 11 observational studies   | 10.4% <sup>3</sup>              | 6.1% (2.8% to 10.0%)   | Very Low<br>(Serious indirectness <sup>1</sup> )                  | We are very uncertain of the effect of corticosteroids on mortality                       |
| Superinfection         | OR 2.74 (95% CI 1.51 to 4.95)<br>Based on data from 6114 participants from 7 observational studies  | 7.2% <sup>4</sup>               | 10.3% (3.3% to 20.5%)  | Very low<br>(Serious risk of bias and indirectness <sup>2</sup> ) | We are very uncertain of the effect of corticosteroids on superinfections                 |
| Mechanical ventilation | OR 5.54 (95% CI 1.83 to 16.80)<br>Based on data from 4364 participants from 4 observational studies | 41.8% <sup>4</sup>              | 38.1% (15.0% to 50.6%) | Very low<br>(serious risk of bias and indirectness <sup>2</sup> ) | We are very uncertain of the effect of corticosteroids on need for mechanical ventilation |

<sup>1</sup>Observational studies started at low quality of evidence. Additional concern was indirectness (we applied the results to severe COVID-19 patients, but the relative effect was derived from hospitalized influenza patients).

<sup>2</sup>Observational studies started at low quality of evidence. Additional concerns included high risk of indication bias because unadjusted estimates included and indirectness (we applied the results to severe COVID-19 patients, but the relative effect was derived from hospitalized Influenza patients).

<sup>3</sup>Baseline risk from a study of the severe COVID-19 patients without corticosteroids use: Guan W et al. doi: 10.1056/NEJMoa2002032.

<sup>4</sup>Baseline risk comes from median effect of the control group in the included studies.

**Table 7: GRADE summary of findings: Corticosteroids in severe COVID-19, indirect evidence from randomized controlled trials of patients hospitalized with CAP**

| Outcomes                           | Relative effects                                                             | Absolute effect estimates                                   |                             | Quality of evidence                                                                                  | Plain language summary                                                                       |
|------------------------------------|------------------------------------------------------------------------------|-------------------------------------------------------------|-----------------------------|------------------------------------------------------------------------------------------------------|----------------------------------------------------------------------------------------------|
|                                    |                                                                              | Baseline risk for control group <sup>1</sup>                | Difference (95% CI)         |                                                                                                      |                                                                                              |
| Mortality                          | RR 0.70 (95% CI 0.50 to 0.98)<br>Based on data from 2034 patients in 13 RCTs | 10.4%                                                       | -3.1% (-0.2% to -5.2%)      | Very low<br>(Very serious indirectness <sup>2</sup> and serious inconsistency)                       | We are very uncertain of the effect of corticosteroids on mortality                          |
| Length of ICU stay                 | Based on data from 1376 patients in 8 RCTs                                   | The median length of ICU stay was 8.3 days                  | MD -1.7 days (-3.4 to 0.1)  | Very low<br>(Serious inconsistency, very serious indirectness and serious imprecision <sup>3</sup> ) | We are very uncertain of the effect of corticosteroids on length of ICU stay                 |
| Length of Hospital stay            | Based on data from 1636 patients in 10 RCTs                                  | The median length of hospital stay was 14.3 days            | MD -1.8 days (-2.8 to -0.8) | Very low<br>(Serious inconsistency, very serious indirectness and serious imprecision <sup>4</sup> ) | We are very uncertain of the effect of corticosteroids on length of hospital stay            |
| Need for mechanical ventilation    | RR 0.42 (95% CI 0.23 to 0.76)<br>Based on data from 1017 patients in 5 RCTs  | 18.0%                                                       | -10.4% (-13.8% to -4.3%)    | Low<br>(Very serious indirectness <sup>2</sup> )                                                     | Corticosteroids may reduce need for mechanical ventilation                                   |
| Duration of mechanical ventilation | Based on data from 199 patients in 5 RCTs                                    | The median duration of mechanical ventilation was 11.3 days | MD -3.5 days (-5.2 to -1.8) | Very low<br>(Serious risk of bias and very serious indirectness <sup>5</sup> )                       | We are very uncertain of the effect of corticosteroids on duration of mechanical ventilation |



|                           |                                                                               |      |                        |                                                                     |                                                                            |
|---------------------------|-------------------------------------------------------------------------------|------|------------------------|---------------------------------------------------------------------|----------------------------------------------------------------------------|
| Serious hyperglycemia     | RR 1.62 (95% CI 1.02 to 2.67)<br>Based on data from 1476 patients in 8 RCTs   | 9.2% | 5.7% (0.18% to 15.3%)  | Low<br>(Serious indirectness <sup>6</sup> )                         | Corticosteroids probably increase serious hyperglycemia events             |
| Gastrointestinal bleeding | RR 0.99 (95% CI 0.43 to 2.24)<br>Based on data from 1228 patients in 8 RCTs   | 3.0% | -0.03% (-1.7% to 3.7%) | Low<br>(Serious indirectness and serious imprecision <sup>6</sup> ) | Corticosteroids may have little or no impact on gastrointestinal bleeding  |
| Neuropsychiatric events   | RR 1.91 (95% CI 0.68 to 5.39)<br>Based on data from 1142 patients from 4 RCTs | 1.6% | 1.4% (-0.5% to 7%)     | Low<br>(Serious indirectness and serious imprecision <sup>6</sup> ) | Corticosteroids may result in a small increase neuropsychiatric events     |
| Superinfection            | 1.31 (95% CI 0.69 to 2.50)<br>Based on data from 1500 patients in 8 RCTs      | 3.7% | 1.1% (-1.1% to 5.5%)   | Low<br>(Serious indirectness and serious imprecision <sup>6</sup> ) | Corticosteroids may result in a small or no increase superinfection events |

Note: RR = risk ratio, CI = confidence interval, RCTs = randomized controlled trials, MD = mean difference.

1Mortality baseline risk was obtained from COVID-19 ARDS patients without corticosteroid treatment – Guan 10.1056/NEJMoa2002032. The baseline risk for the length of ICU stay, hospital stay, duration of mechanical ventilation and adverse events comes from median effect of the control group in the included RCTs.

2We rated down two levels due to indirectness; the pneumonia etiology across the studies is inconsistent and might not represent the COVID-19 population. We also rated down for inconsistency because of a possible subgroup effect that suggests mortality benefit restricted to those with severe pneumonia.

3We rated down two levels due to indirectness; one for inconsistency ( $I^2=76%$ , heterogeneity p-value 0.0001); and one for of imprecision because the effect estimates are consistent with important benefit and harm.

4We rated down two levels due to indirectness; one for inconsistency ( $I^2=47%$ , heterogeneity p-value 0.006) and one for imprecision because the lower confidence interval includes important benefit and important harm.

5We rated down one level due to risk of bias and two levels due to indirectness. We did not rate down due to inconsistency, the effect estimates were in the same direction, despite the  $I^2$  54% and the p value of 0.07.

6 We rated down by one level due to indirectness, as we do not expect the COVID-19 population differs as much from other populations in adverse effects as it does in benefits, and one for imprecision because effect estimates are not consistent with benefit or harm.
